# Supplementary material for: Deletion of PLD2 Alleviates LPS Induced Acute Lung Injury by Inhibiting STAT3 Phosphorylation and Regulating Endothelial Tight Junctions
Source: Research Square preprint supplement (doi:10.21203/rs.3.rs-1641656/v2), 2022-06-10
Supplement: Supplementary file 1 [file 68016552a862b333d28be098.docx]

**Fig. 2.**

**
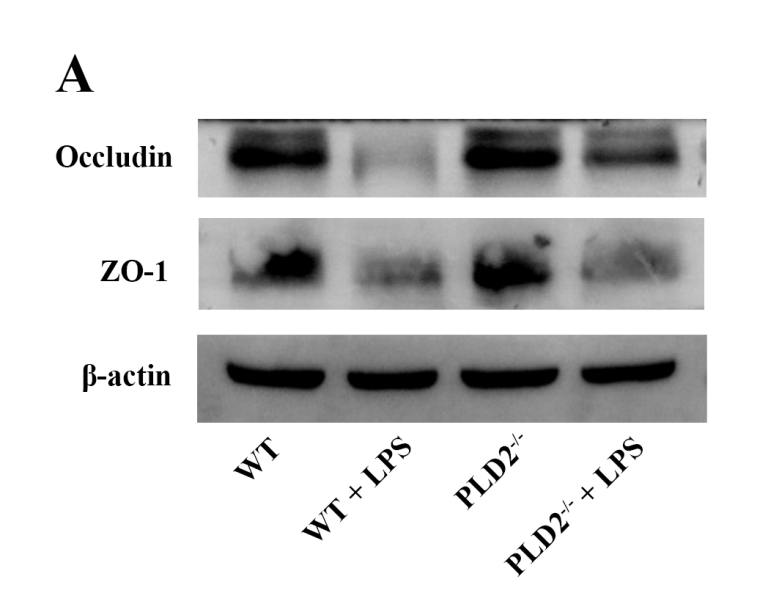
**

**Occludin**

**
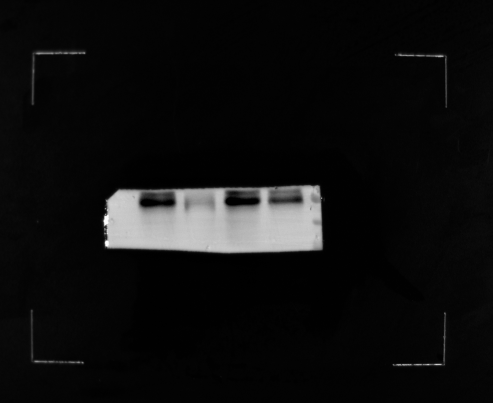
**

52kDa

**ZO-1**

**
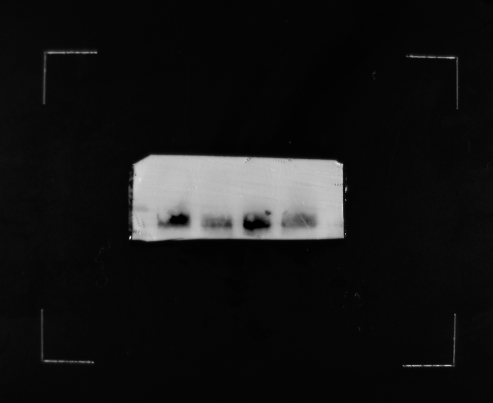
**

195kDa

**β-actin**

**
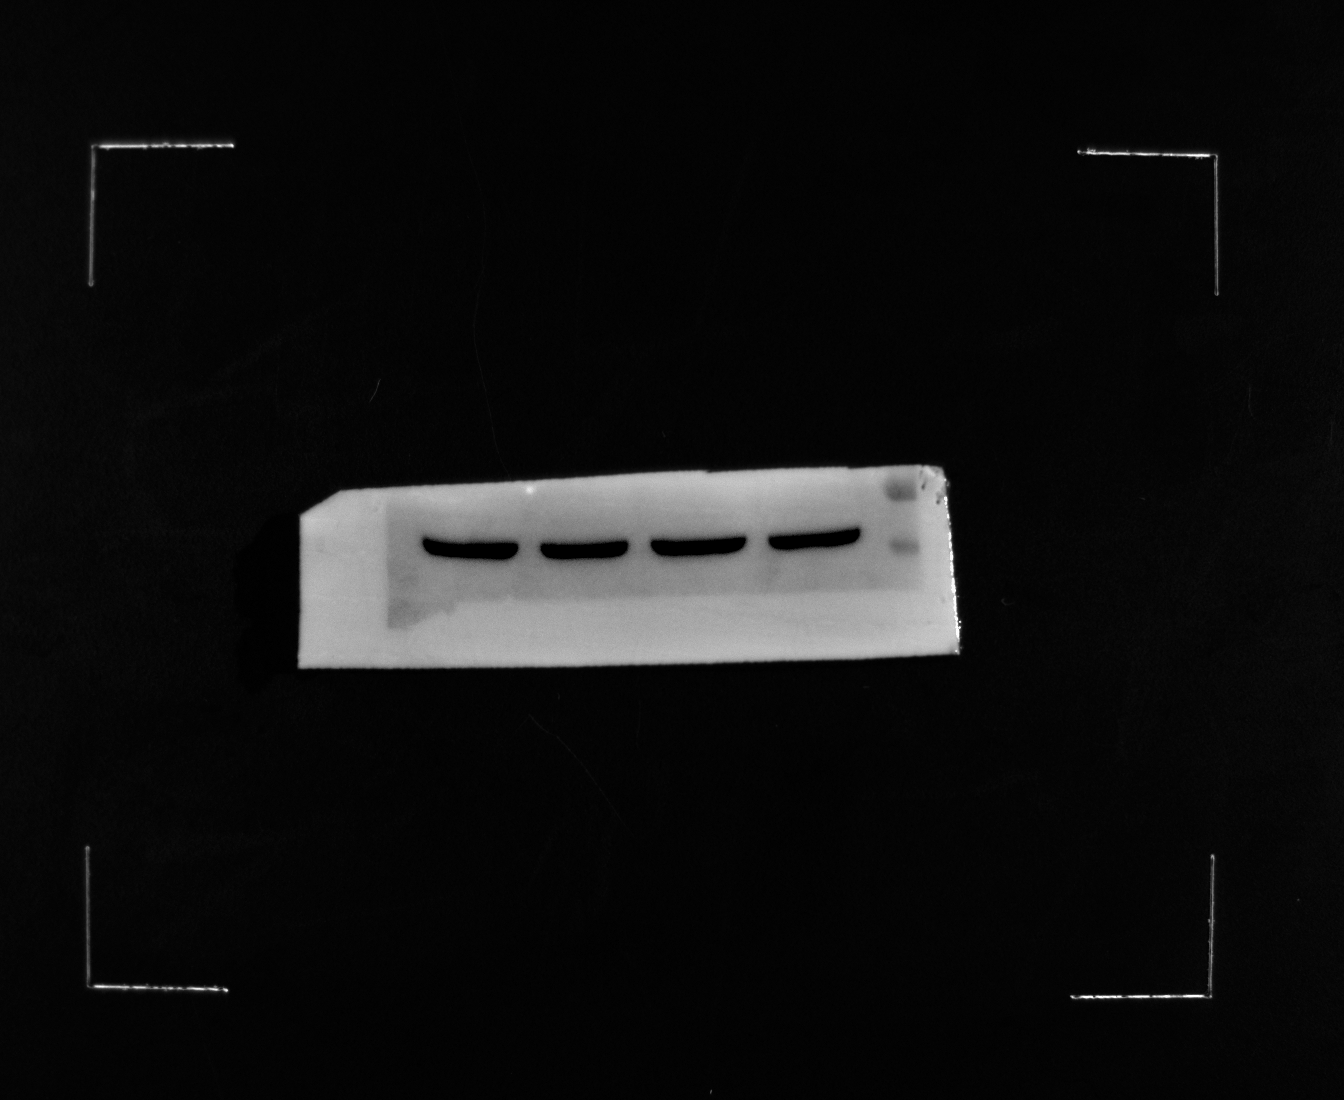
**

42kDa

**Fig. 3.**

**
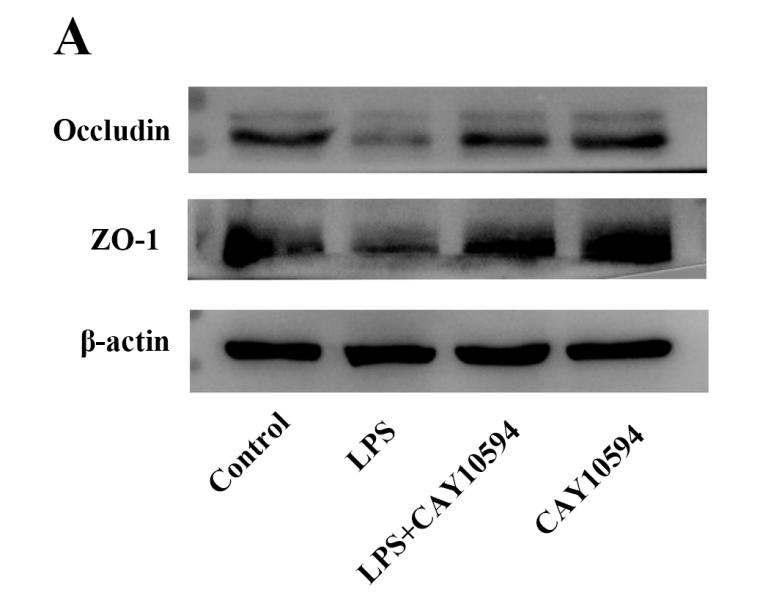
**

**Occludin**

**
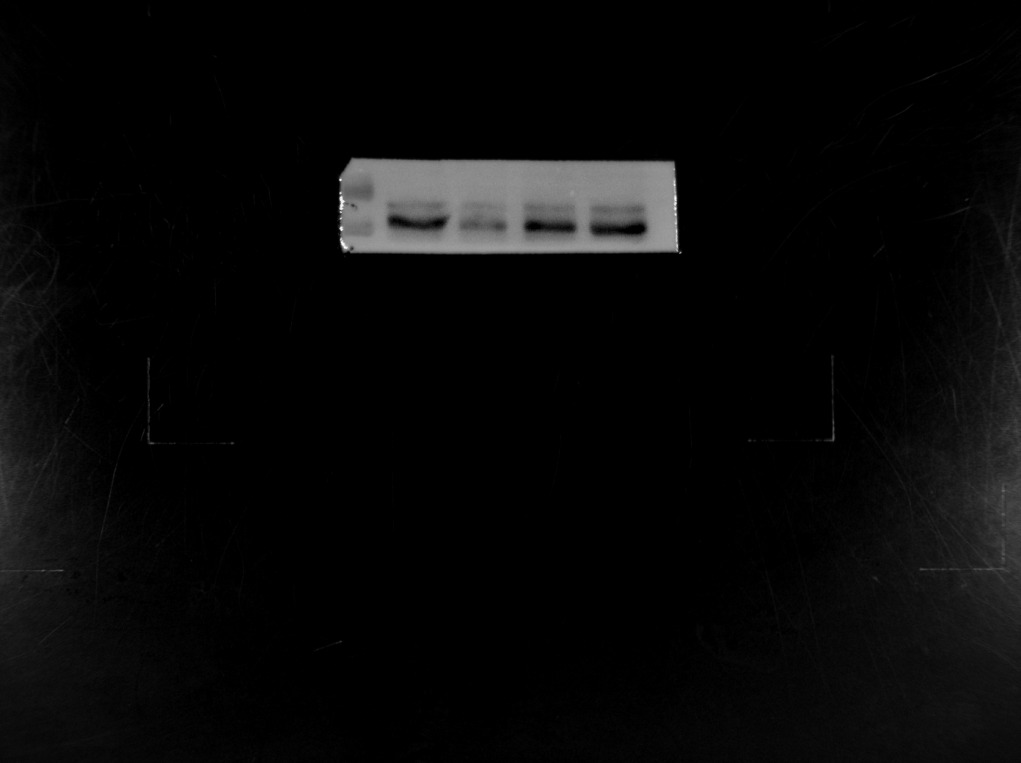
**

52kDa

**ZO-1**

**
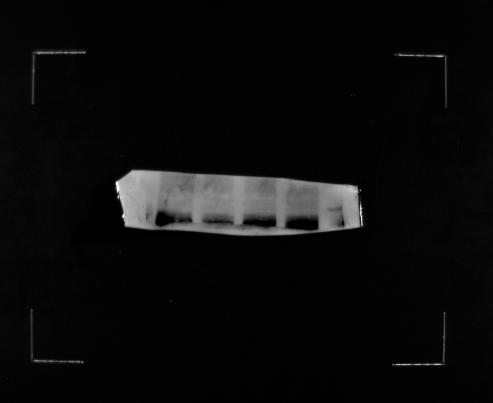
**

195kDa

**β-actin**

**
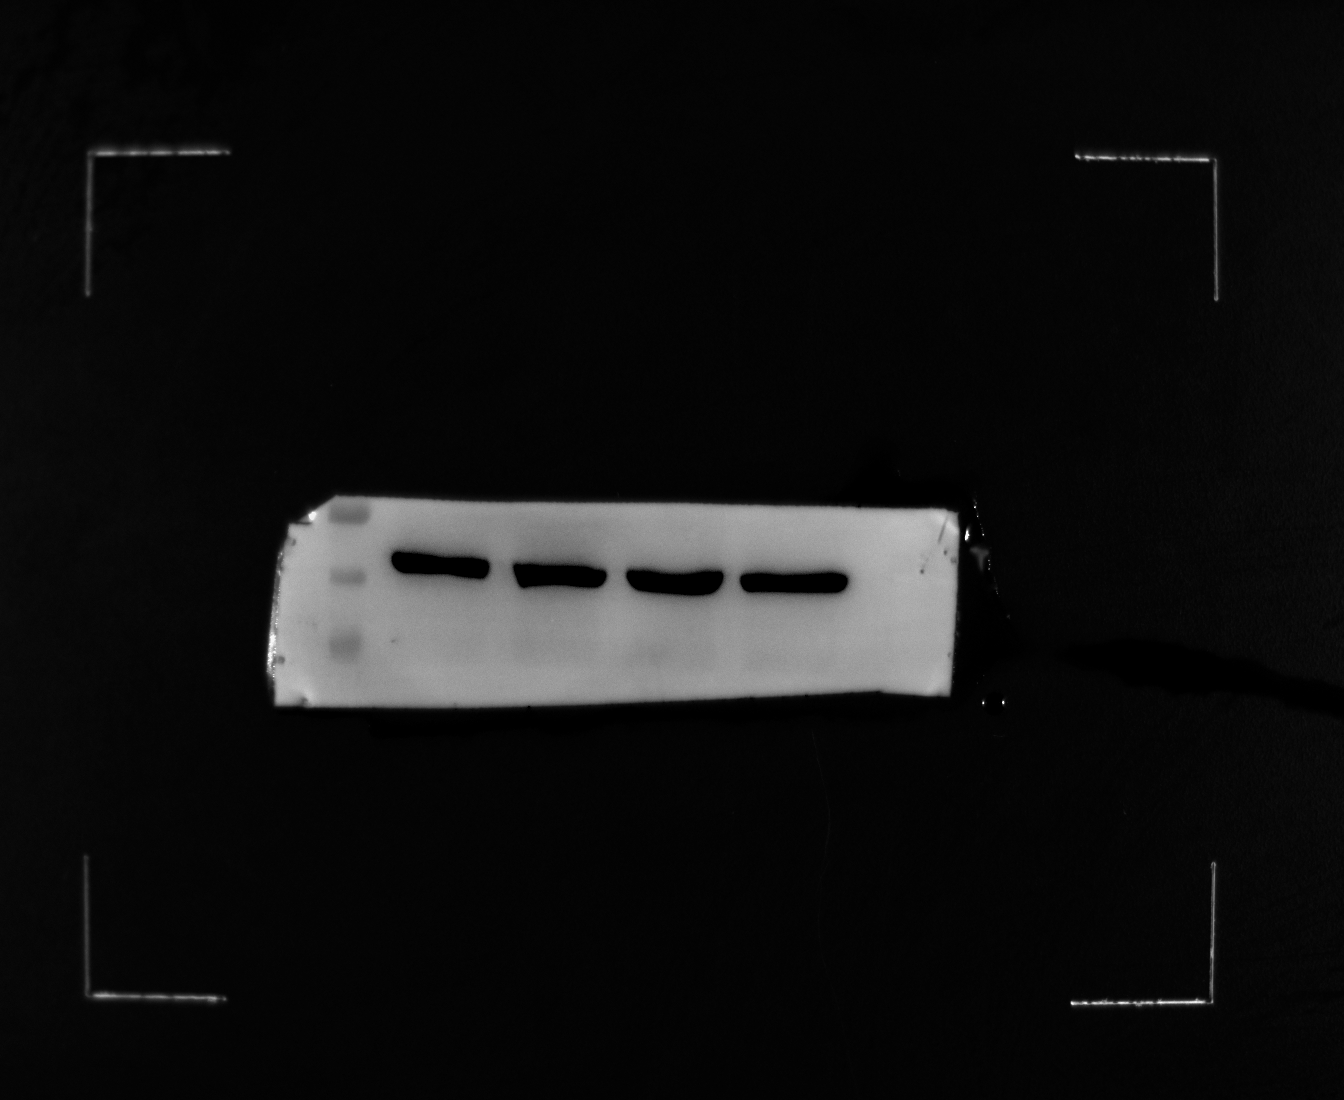
**

42kDa

**Fig. 4.**

**
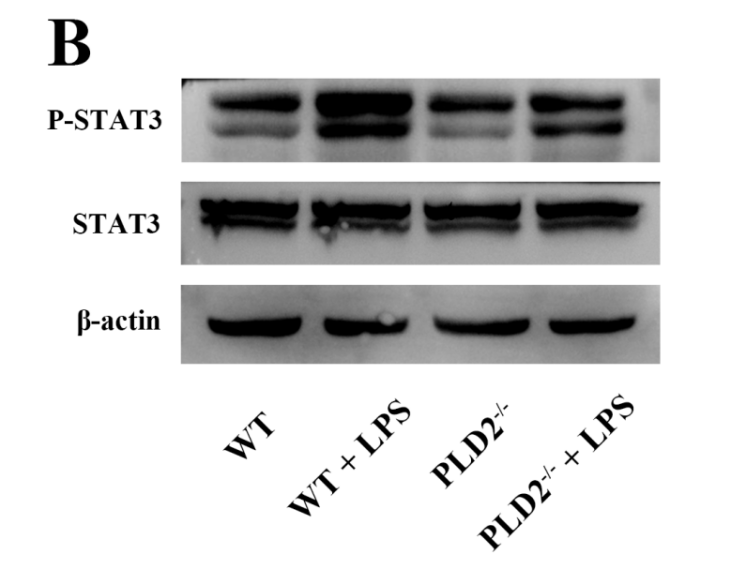
**

**P-STAT3**

**
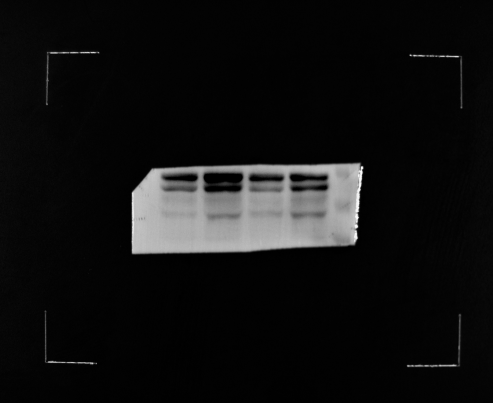
**

98kDa

**STAT3**

**
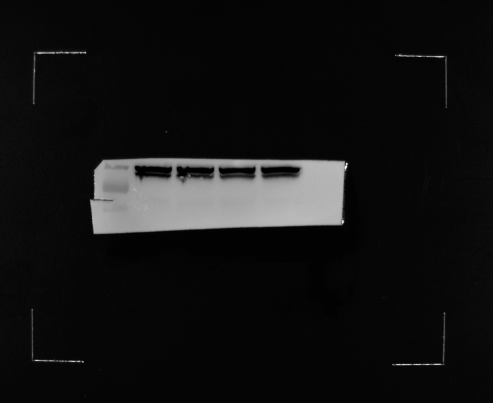
**

92kDa

**β-actin**

**
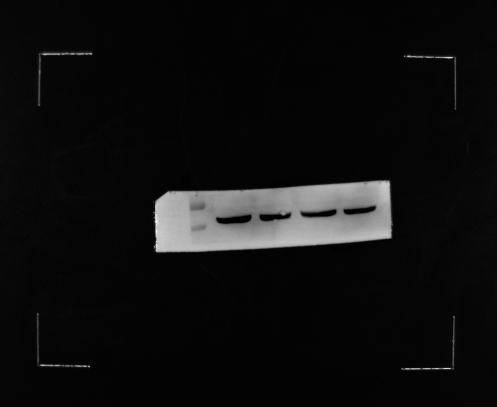
**

42kDa

**
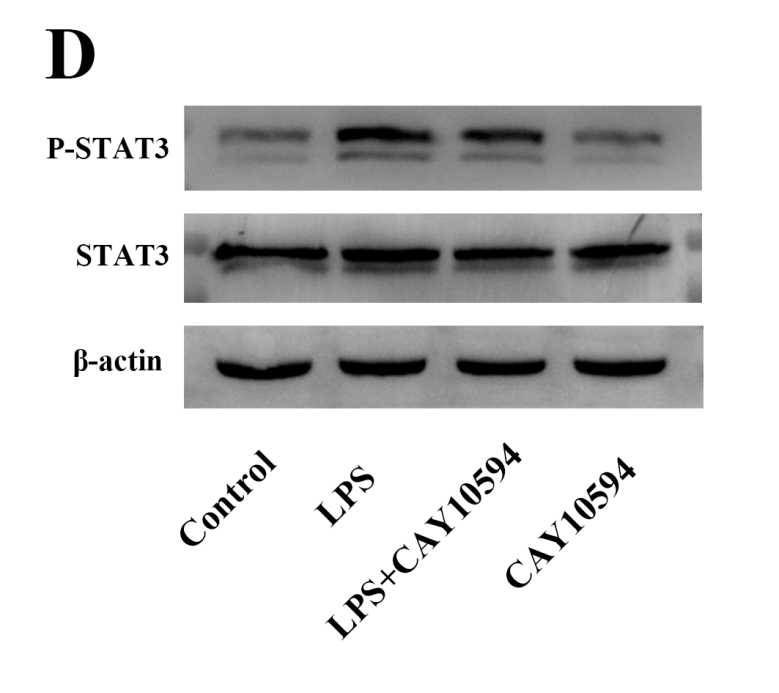
**

**P-STAT3**

**
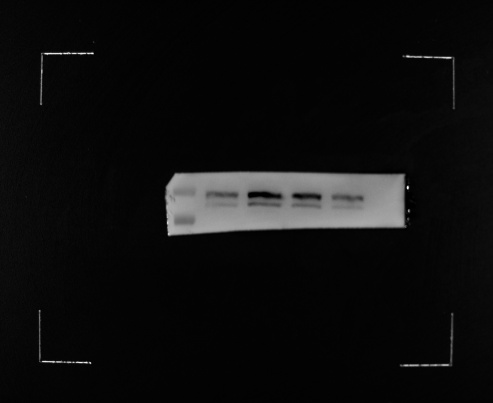
**

98kDa

**STAT3**

**
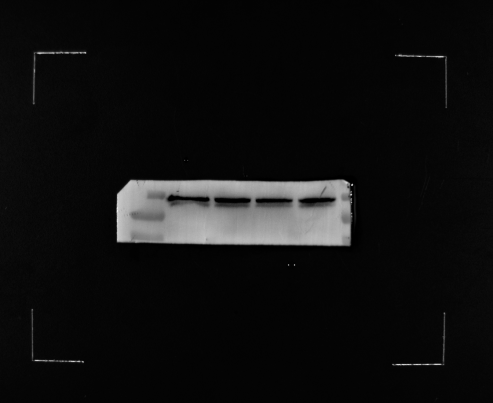
**

92kDa

**β-actin**

**
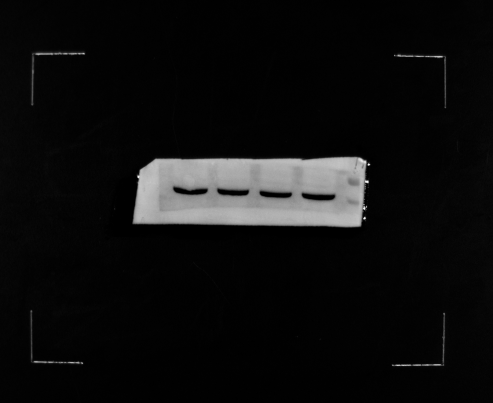
**

42kDa

**
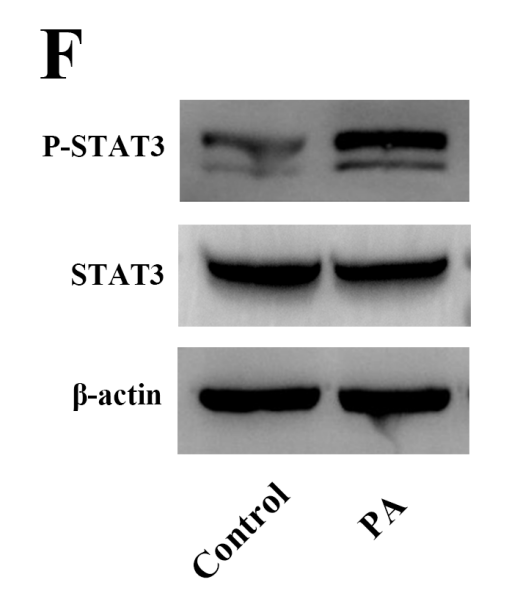
**

**P-STAT3**

**
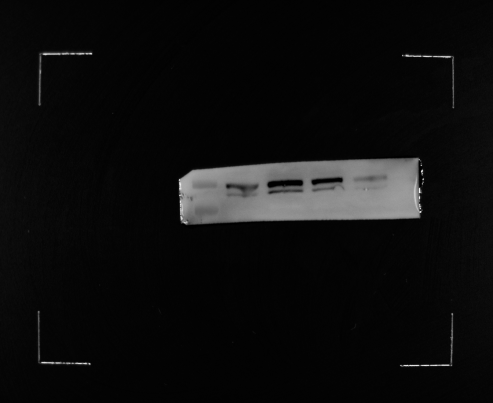
**

98kDa

**STAT3**

**
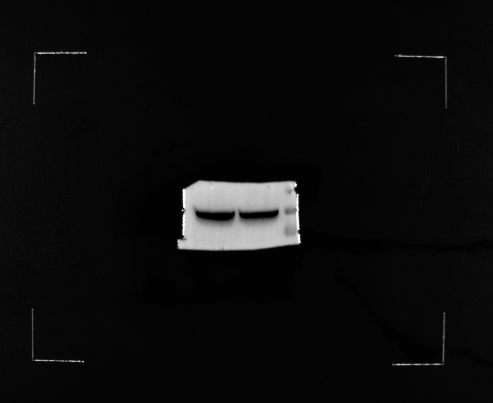
**

Note: Hello, the pictures in the article were originally designed for 4 groups of experiments, which were divided into Control, PA, PA+STAT3-IN-1, and STAT3-IN-1 groups, and then divided into two groups according to the experimental design, which were divided into Control and PA groups, so the first two groups were intercepted on the basis of the original image.

92kDa

**β-actin**

**
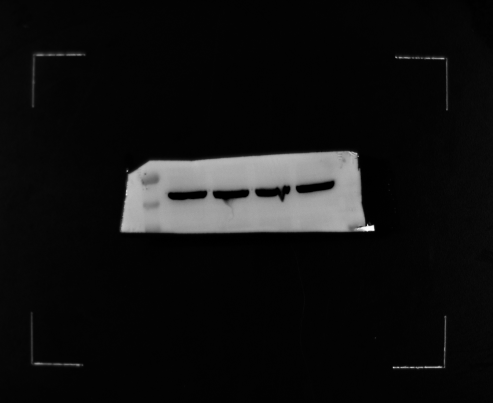
**

42kDa

**Fig. 5.**

**
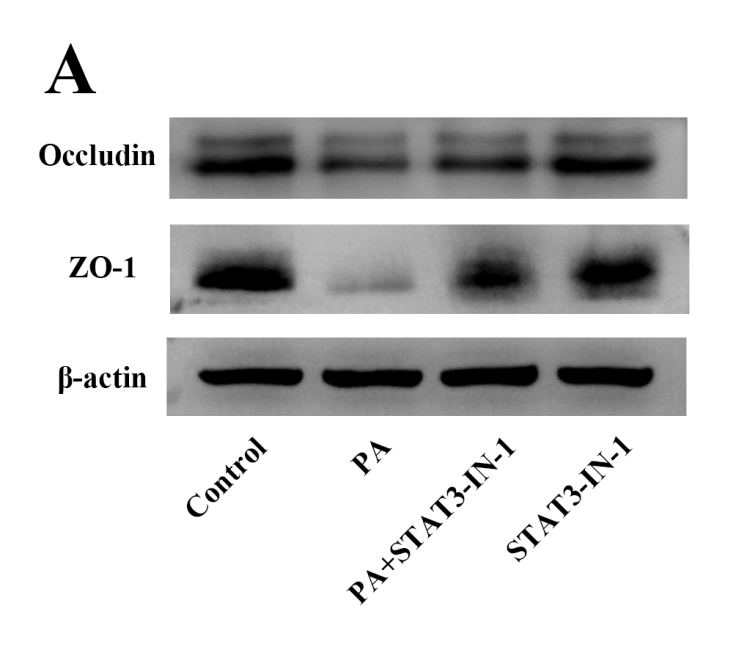
**

**Occludin**

**
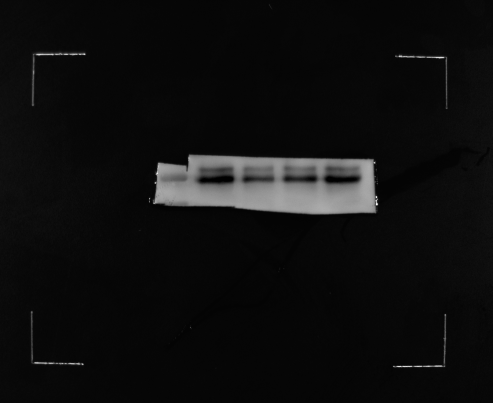
**

52kDa

**ZO-1**

**
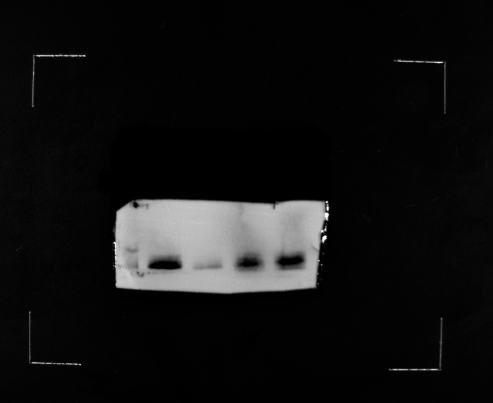
**

195kDa

**β-actin**

**
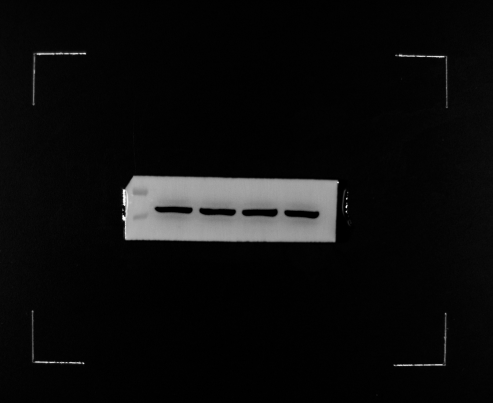
**

42kDa
